# Supplementary material for: Drying-induced back flow of colloidal suspensions confined in thin unidirectional drying cells
Source: Royal Society of Chemistry journal article supplement (doi:10.1039/d0ra02837a), 2020-01-01
Supplement: d0ra02837a1.pdf [file d0ra02837a1.pdf]

1 **Electronic supplemental information (ESI)**

2

3 **Drying-induced back flow of colloidal suspensions confined in thin unidirectional drying cells.**

4

5 *Kai Inoue<sup>1</sup> and Susumu Inasawa<sup>1,2\*</sup>*

6 *<sup>1</sup>Graduate School of Bio-Applications and Systems Engineering*

7 *and*

8 *<sup>2</sup>Department of Chemical Engineering*

9 *Tokyo University of Agriculture and Technology, 2-24-16 Nakacho, Koganei, Tokyo 184-8588, Japan*

10 Corresponding author: [inasawa@cc.tuat.ac.jp](mailto:inasawa@cc.tuat.ac.jp), Tel: +81-42-388-7105, Fax: +81-42-388-7798

11

12

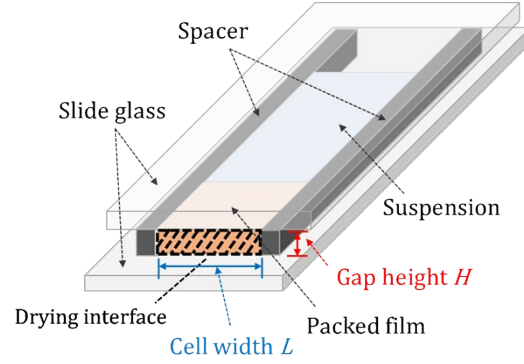

**Fig. S1** Schematic illustration of a unidirectional drying cell (a Hele-Shaw cell). Two parallel silicon rubber spacers were set between two slide glasses. Colloidal suspension was introduced into the narrow gap space. Water spontaneously evaporated at the tip of the cell (denoted as “Drying interface” in the figure), and packed film gradually grew from the interface to the suspension.

1 The information of video files in the ESI were as follows,  
2  
3 **Movie 1** Movie for transmission microscope images in Fig. 1. One second in the movie corresponds to  
4 1500 s in real time.  
5  
6 **Movie 2** Movie for fluorescent images in Fig. 1. One second in the movie corresponds to 1500 s in real  
7 time.  
8  
9 **Movie 3** Flow of a colloidal suspension at a height position of 40  $\mu\text{m}$  above the bottom of the cell. Diameter  
10 of particles was 45 nm and the gap height was 100  $\mu\text{m}$ . Fluorescent observation was used for observation.  
11 One second in the movie corresponds to 5 s in real time. The observed height position was denoted as “A”  
12 in Fig. 2a.  
13  
14 **Movie 4** Flow of a colloidal suspension around the bottom of the cell. All conditions were the same as in  
15 Movie 3. The observed height position was denoted as “B” in Fig. 2a.  
16  
17
